# Supplementary material for: Changes in Cancer Patients' and Caregivers' Disease Perceptions While Receiving Early Palliative Care: A Qualitative and Quantitative Analysis
Source: PubMed Central journal article supplement — Oncologist. 2021 Sep 29;26(12):e2274–87. doi: 10.1002/onco.13974 (PMC8649024; doi:10.1002/onco.13974), 2021-09-29
Supplement: ONCO-26-e2274-s001.pdf [file ONCO-26-e2274-s001.pdf]

Supplemental Tables for:

Changes in cancer patients' and caregivers' disease perceptions while receiving early palliative care: a qualitative and quantitative analysis.

Eleonora Borelli et al.

**1 Supplemental Tables**

2

**3 Table 1S. Questions of the semi structured interviews for patients and caregivers.**

| Code          | Question                                                                                                        |
|---------------|-----------------------------------------------------------------------------------------------------------------|
| PAST          | Talk about your disease experience prior the EPC.                                                               |
| PRESENT       | Talk about your disease experience during the EPC.                                                              |
| FUTURE        | Talk about your perception and expectations of the future and your thoughts and feelings about the end of life. |
| OPEN QUESTION | Is there anything more that you would like to say?                                                              |

4

5

**6 Table 2S. LIWC's categories and subcategories analyzed in participants' reports. Examples**

**7 are reported for each of them.**

| AFFECTIVE PROCESSES                                     |                                                       | COGNITIVE PROCESSES                                         | BIOLOGICAL PROCESSES                       | AGENCY                                               |
|---------------------------------------------------------|-------------------------------------------------------|-------------------------------------------------------------|--------------------------------------------|------------------------------------------------------|
| Positive affects<br>(e.g., good, peaceful, reassurance) | Negative affects<br>(e.g., pain, loneliness, problem) | Causal Thinking<br>(e.g., how, thus, yet)                   | Health<br>(e.g., medical, drug, treatment) | 1 <sup>st</sup> person singular<br>(e.g., I, my, me) |
|                                                         |                                                       | Insight thinking<br>(e.g., to be honest, to solve, to know) | Body<br>(e.g., to eat, to sleep, to walk)  |                                                      |
| Optimism<br>(e.g., improvement,                         | Anxiety<br>(e.g., anxiety, frightened,                |                                                             |                                            |                                                      |

---

hope, positive)    terrible)

Anger

(e.g., angry,

aggressive,

fight)

Sadness

(e.g.,

surrender,

depression,

emptiness)
